# Supplementary material for: Determination of hydrazine at Ontario nuclear power plants
Source: Royal Society of Chemistry journal article supplement (doi:10.1039/c5ay02178b), 2015-01-01
Supplement: c5ay02178b1.pdf [file c5ay02178b1.pdf]

SUPPLEMENTARY MATERIAL

Details of sampling at the Bruce, Pickering and Darlington NPPs.

**TABLE 1S. BRUCE NPP (LAKE HURON)**

| Sample Description       | Northing      | Easting       | Depth           | Dissolved Oxygen [mg/L] | pH   | Conductivity [ $\mu$ S/cm] |
|--------------------------|---------------|---------------|-----------------|-------------------------|------|----------------------------|
| BP Site D                | 44°20'39.76"N | 81°34'36.45"W | Surface         | 10.04                   | 8.44 | 213.31                     |
| BP Site D                | 44°20'39.76"N | 81°34'36.45"W | 1 m             | 10.17                   | 8.49 | 213.43                     |
| BP Site D                | 44°20'39.76"N | 81°34'36.45"W | 1 m duplicate   | 10.2                    | 8.51 | 213.46                     |
| BP Site D                | 44°20'39.76"N | 81°34'36.45"W | 2 m (Bottom-1m) | 10.23                   | 8.53 | 213.49                     |
| BP Site D                | 44°20'39.76"N | 81°34'36.45"W | Field Blank     |                         |      |                            |
| BP Site H                | 44°18'59.87"N | 81°36'41.05"W | Surface         | 9.64                    | 8.46 | 197.5                      |
| BP Site H                | 44°18'59.87"N | 81°36'41.05"W | 1 m             | 9.82                    | 8.35 | 197.17                     |
| BP Site H                | 44°18'59.87"N | 81°36'41.05"W | 2 m (Mid Depth) | 9.85                    | 8.35 | 193.1                      |
| BP Site H                | 44°18'59.87"N | 81°36'41.05"W | 4 m (Bottom-1m) | 9.98                    | 8.36 | 190.4                      |
| BP Ambient site (Stn 29) | 44°22'00.00"N | 81°50'00.00"W | Surface         | 9.6                     | 8.09 | 222                        |
| Cooler blank             |               |               |                 |                         |      |                            |

**TABLE 2S. PICKERING NPP (LAKE ONTARIO)**

| Sample Description            | Northing      | Easting       | Depth, m | Dissolved Oxygen [mg/L] | pH   | Conductivity [ $\mu$ S/cm] |
|-------------------------------|---------------|---------------|----------|-------------------------|------|----------------------------|
| Pickering A surface           | 43°48'28.08"N | 79° 3'37.20"W | 0.2      | 10.32                   | 7.48 | 331                        |
| Pickering A 1 m from surface  | 43°48'28.08"N | 79° 3'37.20"W | 1.5      | 10.18                   | 7.49 | 333                        |
| Pickering A 3 m from surface  | 43°48'28.08"N | 79° 3'37.20"W | 3.5      | 10.16                   | 7.51 | 333                        |
| Pickering B surface           | 43°48'24.00"N | 79° 3'35.82"W | 0.12     | 9.97                    | 7.53 | 332                        |
| Pickering C surface           | 43°48'18.36"N | 79° 3'36.12"W | 0.14     | 9                       | 7.56 | 333                        |
| Pickering C surface duplicate | 43°48'18.36"N | 79° 3'36.12"W | 0.14     | 9                       | 7.56 | 333                        |

|                                     |               |               |      |       |      |     |
|-------------------------------------|---------------|---------------|------|-------|------|-----|
| Pickering D surface                 | 43°48'12.96"N | 79° 3'35.58"W | 0.14 | 9.56  | 7.6  | 332 |
| Pickering E surface                 | 43°48'24.84"N | 79° 3'28.20"W | 0.04 | 9.82  | 7.65 | 335 |
| Pickering F surface                 | 43°48'26.94"N | 79° 3'21.06"W | 0.13 | 9.78  | 7.64 | 340 |
| Pickering F 1 m from surface        | 43°48'26.94"N | 79° 3'21.06"W | 0.95 | 10.06 | 7.65 | 341 |
| Pickering ambient surface           | 43°47'44.22"N | 79° 4'16.08"W | 0.06 | 9.56  | 7.66 | 332 |
| Pickering ambient surface duplicate | 43°47'44.22"N | 79° 4'16.08"W | 0.06 | 9.56  | 7.66 | 332 |
| Cooler blank                        |               |               |      |       |      |     |

**TABLE 3S. DARLINGTON NPP (LAKE ONTARIO)**

| Sample Description             | Northing      | Easting       | Depth, m | Dissolved Oxygen [mg/L] | pH   | Conductivity [µS/cm] |
|--------------------------------|---------------|---------------|----------|-------------------------|------|----------------------|
| Darlington A surface           | 43°51'41.04"N | 78°44'19.56"W | 0.06     | 9.45                    | 7.89 | 308                  |
| Darlington B surface           | 43°51'29.28"N | 78°44'36.06"W | 0.12     | 9.13                    | 7.9  | 316                  |
| Darlington C surface           | 43°51'29.64"N | 78°44'26.16"W | 0.2      | 9.03                    | 7.85 | 317                  |
| Darlington C surface duplicate | 43°51'29.64"N | 78°44'26.16"W | 0.2      | 9.03                    | 7.85 | 317                  |
| Darlington D surface           | 43°51'29.94"N | 78°44'18.96"W | 0.15     | 9.15                    | 7.91 | 316                  |
| Darlington E surface           | 43°51'19.38"N | 78°44'40.56"W | 0.24     | 9.23                    | 7.96 | 316                  |
| Darlington F surface           | 43°51'18.30"N | 78°44'29.34"W | 0.16     | 9.1                     | 7.87 | 317                  |
| Darlington F surface duplicate | 43°51'18.30"N | 78°44'29.34"W | 0.16     | 9.1                     | 7.87 | 317                  |
| Darlington F 1 m from surface  | 43°51'18.30"N | 78°44'29.34"W | 0.91     | 9.24                    | 7.89 | 317                  |
| Darlington F 6 m from surface  | 43°51'18.30"N | 78°44'29.34"W | 5.83     | 9.33                    | 7.9  | 316                  |

|                                      |               |               |       |       |      |     |
|--------------------------------------|---------------|---------------|-------|-------|------|-----|
| Darlington F<br>10 m from<br>surface | 43°51'18.30"N | 78°44'29.34"W | 9.28  | 9.3   | 7.92 | 316 |
| Darlington G<br>surface              | 43°51'18.90"N | 78°44'19.38"W | 0.1   | 9.17  | 7.97 | 315 |
| Darlington G 1<br>m from<br>surface  | 43°51'18.90"N | 78°44'19.38"W | 0.8   | 9.3   | 7.97 | 316 |
| Darlington G 6<br>m from<br>surface  | 43°51'18.90"N | 78°44'19.38"W | 5.76  | 9.37  | 7.98 | 316 |
| Darlington G<br>12 m from<br>surface | 43°51'18.90"N | 78°44'19.38"W | 11.77 | 9.37  | 7.97 | 316 |
| Darlington<br>ambient<br>sample      | 43°51'21.72"N | 78°45'55.50"W | 0.13  | 10.08 | 7.97 | 317 |
| Cooler blank                         |               |               |       |       |      |     |
